# Supplementary material for: The national MD-PhD program outcomes study: Outcomes variation by sex, race, and ethnicity
Source: JCI journal article supplement (doi:10.1172/jci.insight.133010), 2019-10-02
Supplement: sd1 [file 1]

**The national MD-PhD program outcomes study: Outcomes variation by sex, race and ethnicity**

Myles H. Akabas, MD PhD<sup>a</sup> and Lawrence F. Brass, MD PhD<sup>b</sup>

Address correspondence to: both authors

Myles H. Akabas

Professor of Physiology & Biophysics, Neuroscience and Medicine

Albert Einstein College of Medicine

1300 Morris Park Avenue

Bronx, NY 10461

[myles.akabas@einstein.yu.edu](mailto:myles.akabas@einstein.yu.edu)

Lawrence F. Brass

Professor of Medicine and Pharmacology

University of Pennsylvania Perelman School of Medicine

Room 815 BRB-II/II

421 Curie Blvd

Philadelphia, PA 19104

[brass@Pennmedicine.upenn.edu](mailto:brass@Pennmedicine.upenn.edu)

## Supplementary Figures

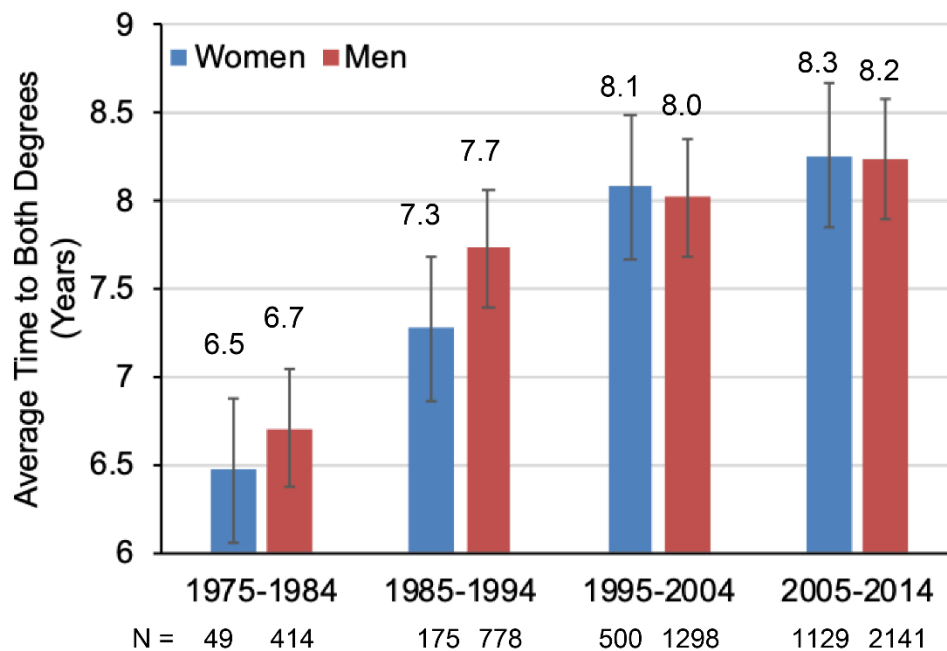

**Supplementary Figure S1. Time to graduation with both degrees as a function of sex and decade of graduation for survey responders.** Average time to both degrees for women (blue bars) and men (red bars) as a function of decade of graduation. Mean time to both degrees is shown above each bar. Number of individuals in each cohort (N) is shown below the graduation decade. Mean  $\pm$  SEM is plotted.

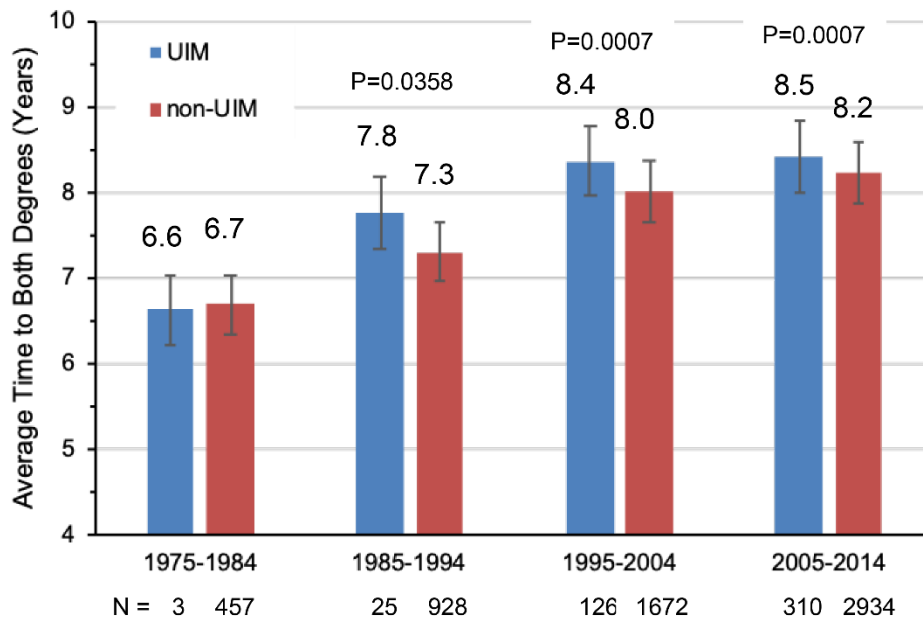

**Supplementary Figure S2. Time to graduation with both degrees as a function of underrepresented in medicine (UIM) status and decade of graduation.** Average time to both degrees for UIM (blue bars) and non-UIM (red bars) as a function of decade of graduation. Mean time to both degrees is shown above each bar. Number of individuals in each cohort (N) is shown below the graduation decade. Mean  $\pm$  SEM is plotted. *P* values indicate significant difference between UIM and non-UIM by unpaired two tailed t test.

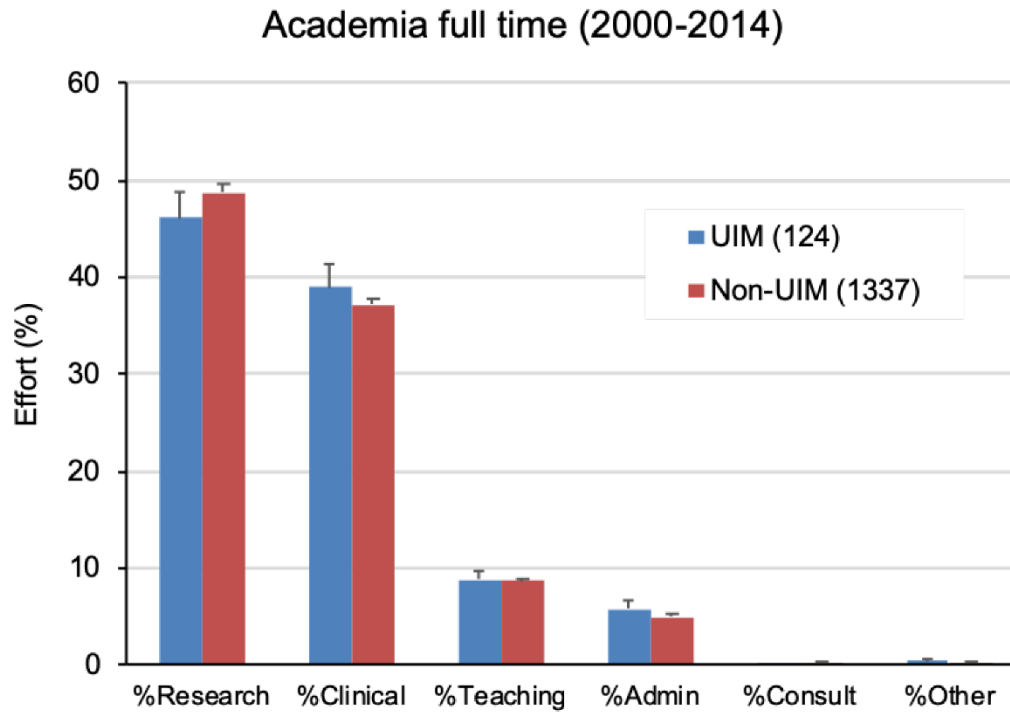

**Supplementary Figure S3. Research and other effort for alumni with a current position in academia full time by UIM status.** Average percent effort for alumni who graduated between 2000 and 2014 in academia full time for research, clinical, teaching, administration, consulting, and other for UIM (blue bars) and non-UIM (red bars). For each individual total effort had to sum to 100%. Number in each group indicated in parenthesis in legend. Mean  $\pm$  SEM is plotted.
